# Supplementary figures and images for: An Evaluation of the Novel Biological Properties of Diterpenes Isolated from Plectranthus ornatus Codd. In Vitro and In Silico
Source: MDPI journal article supplement (doi:10.3390/cells11203243), 2022-10-15

A549

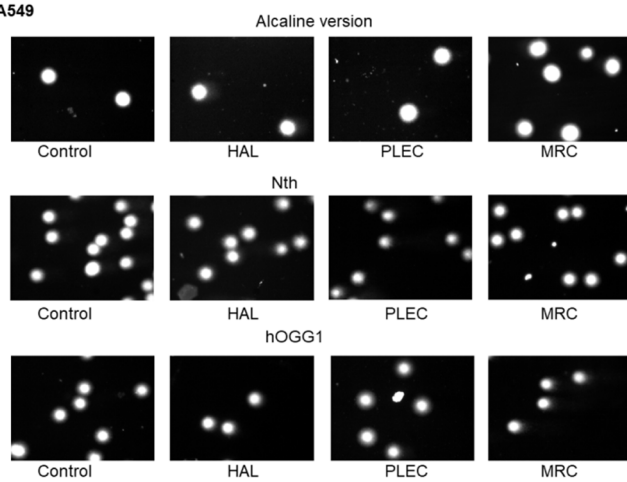

CCRF-CEM

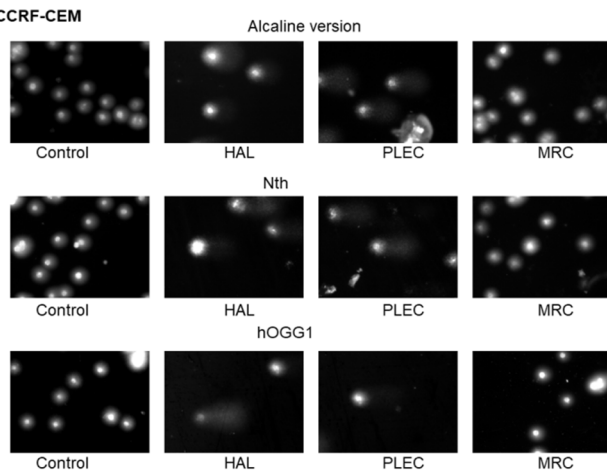

Figure S1: Representative images of comets.

Supplement: s1 [file s1]
